# Supplementary material
Source: Springer Nature journal article supplement (https://www.springermedizin.de/resource/supplementary/12873_2010_114_MOESM1_ESM.pdf/9431464)
Supplement: MOESM1 [file 9431464]

# The Canadian C-Spine Rule

Please check off all choices within applicable boxes:

1. Any One High-Risk Factor Which Mandates Immobilization?

No Yes

- Age  $\geq$  65 years  
OR  
  Dangerous mechanism \*  
OR  
  Numbness or tingling in extremities

Yes

No

2. Any One Low-Risk Factor Which Allows Safe Assessment of Range of Motion?

No Yes

- Simple rearend MVC \*\*  
OR  
  Ambulatory at any time at scene  
OR  
  No neck pain at scene when asked  
OR (answer "yes" if no pain)  
  No pain during midline c-spine palpation  
(answer "yes" if no pain)

No

C-Spine  
Immobilization

Yes

Unable

3. Patient Voluntarily Able to Actively Rotate Neck 45°  
Left and Right When Requested, Regardless of Pain?

No Yes

- 

Able

No C-Spine  
Immobilization \*\*\*

## \* Dangerous Mechanism

- fall from elevation  $\geq$ 3feet/5 stairs
- axial load to head, e.g. diving
- MVC high speed ( $\geq$ 100km/hr), rollover, ejection
- motorized recreational vehicles e.g. ATV
- bicycle collision with object e.g. post, car

## \*\* Simple Rearend MVC Excludes:

- pushed into oncoming traffic
- hit by bus/large truck
- rollover
- hit by high speed vehicle ( $\geq$ 100 km/hr)
